# Supplementary material for: Talk Is Silver, Code Is Gold? Beyond Traditional Notions of Contribution in Peer Production: The Case of Drupal
Source: Frontiers journal article supplement (doi:10.3389/fhumd.2021.618207), 2021-03-18
Supplement: Data_Sheet_1.PDF [file Data_Sheet_1.PDF]

## Appendices

### Appendix A. Figures from Drupal profiles

This appendix contains the figures employed to illustrate the analysis of profiles presented in section 4.1.

Put each item on a separate line or separate them by commas. No HTML allowed.

- ☒ I contributed Drupal patches
- ☒ I contributed Drupal modules
- ☐ I contributed Drupal themes
- ☒ I contributed Drupal installation profiles
- ☒ I contributed to Drupal issue queues
- ☐ I contributed to Drupal.org
- ☒ I contributed Drupal documentation
- ☒ I contributed Drupal translations
- ☐ I helped organize DrupalCon
- ☐ I contributed Drupal automated tests
- ☐ I reviewed Project applications
- ☐ I help in the Drupal support forums
- ☒ I provide Drupal-related services
- ☐ I help mentor new contributors
- ☐ I attended the Drupal conference at FOSDEM 2005 (Antwerp, Belgium)
- ☐ I attended OSCON 2005 or the off-site Drupal conference at OSCON 2005 (Portland, Oregon)
- ☐ I attended LinuxWorldExpo London
- ☐ I attended DrupalCon Amsterdam 2005
- ☐ I attended the Drupal conference colocated with the Open Source CMS and Blogging Tools Summit (Vancouver, Canada)
- ☐ I attended the Drupal conference 2006 (Brussels, Belgium)
- ☐ I attended OSCMS 2007, Sunnyvale
- ☐ I attended DrupalCon Barcelona 2007
- ☐ I attended DrupalCon Boston 2008
- ☐ I attended DrupalCon Szeged, Hungary 2008
- ☐ I attended DrupalCon DC 2009
- ☐ I attended DrupalCon Paris 2009
- ☐ I attended DrupalCon San Francisco 2010
- ☒ I attended DrupalCon Copenhagen 2010
- ☐ I attended DrupalCon Chicago 2011
- ☐ I attended DrupalCon London 2011
- ☐ I attended DrupalCon Denver 2012
- ☐ I attended DrupalCon Munich 2012
- ☐ I attended DrupalCon Portland 2013
- ☐ I attended DrupalCon Sydney 2013
- ☐ I attended DrupalCon Prague 2013
- ☐ I attended DrupalCon Austin 2014
- ☒ I attended DrupalCon Amsterdam 2014
- ☐ I will attend DrupalCon Latin America 2015
- ☐ I will attend DrupalCon Los Angeles 2015
- ☐ I will attend DrupalCon Barcelona 2015

Figure A.1. List of self-assigned contribution activities in the “Drupal” section of the main author’s profile. Retrieved 22<sup>nd</sup> October 2014, from <https://www.drupal.org/user/740628/edit/> (not available unless logged in), under a CC BY-SA 2.0 license.

## Talk is silver, code is gold? Beyond traditional notions of contribution in peer production: the case of Drupal

**History**

**Member for** 9 years 5 months

**Documentation** Over 1000 edits

**Projects**

- [Drupal core](#) (6486 commits)
- [Poll \(from core\)](#) (2557 commits)
- [Spark](#) (160 commits)
- [Quiz](#) (102 commits)
- [Drupal Module Upgrader](#) (92 commits)
- [Pants](#) (76 commits)
- [Revision Moderation](#) (74 commits)
- [Organic groups](#) (72 commits)
- [Documentation](#) (60 commits)
- [Webchick's test profile](#) (52 commits)
- [Drupal 7 to 8 Module Upgrader \[dead\]](#) (51 commits)

Figure A.2. Example of quantified contributions to source code and documentation. Retrieved 5<sup>th</sup> November 2014, from <https://www.drupal.org/u/webchick>, under a CC BY-SA 2.0 license.

| <div>Profile Posts Commits</div> |                                                                                                                                              |                              |                |                     |
|----------------------------------|----------------------------------------------------------------------------------------------------------------------------------------------|------------------------------|----------------|---------------------|
| Type                             | Title                                                                                                                                        | Author                       | Replies        | Last updated        |
| Issue                            | <a href="#">Typo causes WSOD on theme generate new</a>                                                                                       | <a href="#">clivesj</a>      | 10<br>10 new   | 1 min 24 sec ago    |
| Forum topic                      | <a href="#">FAQ on SA-CORE-2014-005 updated</a>                                                                                              | <a href="#">greggles</a>     | 221<br>220 new | 42 min 36 sec ago   |
| Forum topic                      | <a href="#">Drupal 7: not showing uploaded photos and files</a>                                                                              | <a href="#">digibill</a>     | 36<br>1 new    | 11 hours 40 min ago |
| Issue                            | <a href="#">Notice: Undefined variable: _POST in include() (line 1 [...]html.tpl.php) new</a>                                                | <a href="#">gravisrs</a>     | 26<br>26 new   | 2 days 20 hours ago |
| Issue                            | <a href="#">Add a special -none- country entry in the "Available countries" list in order to make the address field really optional. new</a> | <a href="#">scor</a>         | 166<br>2 new   | 3 days 23 hours ago |
| Issue                            | <a href="#">[META] Drupal 8 - Roadmap and Update new</a>                                                                                     | <a href="#">kingfisher64</a> | 33<br>3 new    | 6 days 5 hours ago  |
| Book page                        | <a href="#">Menu block (Drupal 6) new</a>                                                                                                    | <a href="#">JohnAlbin</a>    | 8              | 1 week 4 days ago   |

Figure A.3. Example of list of posts listed in the tab “Posts” of the user profile. Retrieved 5<sup>th</sup> November 2014, from <https://www.drupal.org/user/338895/track>, under a CC BY-SA 2.0 license.

**Localization contributions**

[Spanish](#) 1124 approved translations

**History**

**Member for** 4 years 4 weeks

**Primary profile** [Profile on https://www.drupal.org/](https://www.drupal.org/)

Figure A.4. Example of quantified contributions related to translation activities. Retrieved 5<sup>th</sup> November 2014, from <https://localize.drupal.org/user/311048>, under a CC BY-SA 2.0 license.

## Talk is silver, code is gold? Beyond traditional notions of contribution in peer production: the case of Drupal

### Bio:

Designer, Themener, and general Drupal solutions guy for Mustardseed Media Inc. More commonly known as "that video podcast guy".

Figure A.5. Example of use of the open field “Bio” to display contributions about evangelisation activities. Retrieved 5<sup>th</sup> November 2014, from [https://www.drupal.org/u/rob\\_feature](https://www.drupal.org/u/rob_feature), under a CC BY-SA 2.0 license.

### Drupal

#### My mentors

[JohnAlbin](#), [Bojhan](#), [webchick](#), [nod\\_](#), [berdir](#)

Figure 6. Example of the use of the field “Mentors”, to acknowledge mentorship contributions in a peer-to-peer way. Retrieved 5<sup>th</sup> November 2014, from <https://www.drupal.org/u/lewisnyman>, under a CC BY-SA 2.0 license.

### Bio:

Read more at [www.chandeepkhosa.com](http://www.chandeepkhosa.com), email [hello@chandeepkhosa.com](mailto:hello@chandeepkhosa.com), or call 07962 382 442.

I am a freelance Drupal Site Builder & Front End Developer looking for new freelance projects in London and have been developing websites with Drupal since 2007.

I have been very involved in training and mentoring web developers, particularly young people, getting them into careers specialising in Drupal. I have helped to support the Drupal community by speaking at camps and conferences on topics including e-Commerce & responsive web design.

-- Drupal community --

- ☆ Founding & organising Drupal West London
- ☆ Mentoring apprentices & creating open source curriculum for learning Drupal - Open Drupal
- ☆ Speaking at Drupal camps on Drupal Commerce, Responsive web design & Open Drupal <http://chandeepkhosa.com/?q=speaker>
- ☆ Organising & facilitating a BoF (birds of a feather) session at DrupalCon Amsterdam 2014 <https://amsterdam2014.drupal.org/bof/open-drupal-drupal-apprenticeships-...>
- ☆ Contributing & reviewing front end patches during sprints at Drupal Dev Days Szeged, Drupalaton & DrupalCon Amsterdam

Figure A.7. Example of the use of the open field “Bio” to display contributions about mentoring and face-to-face events activities. Retrieved 5<sup>th</sup> November 2014, from <https://www.drupal.org/u/chandeepkhosa>, under a CC BY-SA 2.0 license.

### History

|                       |                                                                          |
|-----------------------|--------------------------------------------------------------------------|
| Number of times voted | 114                                                                      |
| Co-organized events   | 92                                                                       |
| Submitted events      | 98                                                                       |
| Organizer of groups   | 5                                                                        |
| Member for            | 7 years 17 weeks                                                         |
| Primary profile       | <a href="https://www.drupal.org/">Profile on https://www.drupal.org/</a> |

## Talk is silver, code is gold? Beyond traditional notions of contribution in peer production: the case of Drupal

Figure A.8. Example of quantified contributions related to online community management activities. Retrieved 5<sup>th</sup> November 2014, from <https://groups.drupal.org/user/8713>, under a CC BY-SA 2.0 license.

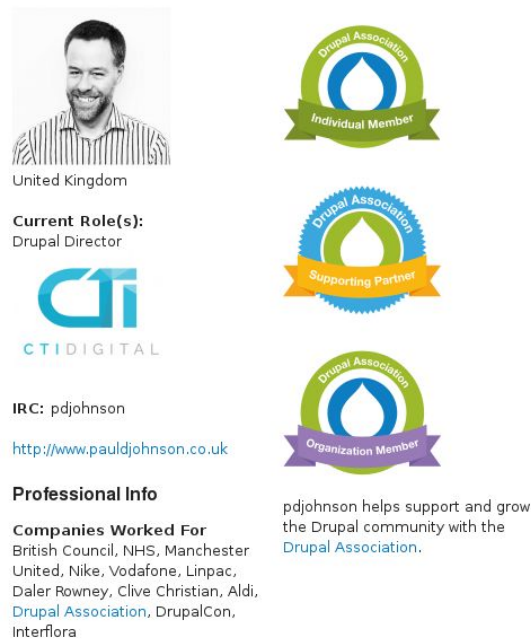

Figure A.9. Example of badges provided by the Drupal Association. Retrieved 5<sup>th</sup> November 2014, from <https://www.drupal.org/u/pjohnson>, under a CC BY-SA 2.0 license.

### Appendix B. Drupal roles

| Drupal role                   | Description                                                                                                                                                        | Examples of Drupal-related technical skills                                       |
|-------------------------------|--------------------------------------------------------------------------------------------------------------------------------------------------------------------|-----------------------------------------------------------------------------------|
| System architect or devop     | Assemble and maintain infrastructures on which Drupal is deployed, manage the migration of data and content.                                                       | MySQL, SSH, Solr, Apache                                                          |
| Developer                     | Develop and test <i>custom</i> modules according to Drupal's coding standards and best practices.                                                                  | PHP, MySQL                                                                        |
| Themer or front-end developer | Translate visual designs into code, develop <i>custom</i> themes and <i>custom</i> modules to implement the displays needed.                                       | CSS, Javascript, HTML                                                             |
| Site builder                  | Install and configure modules to create site features. They have knowledge of theming and development, but mostly use Drupal through the administrative interface. | PHP, MySQL, Javascript                                                            |
| Content Editor and Manager    | Manage content and users on a Drupal site.                                                                                                                         | May not know many advanced functionalities of the Drupal administrative interface |
| Design, UX                    | Possess an understanding of the capabilities of Drupal which helps to create designs which can be understood and implemented with their team.                      | Specialised in visual design, may not know HTML, CSS or JavaScript                |

## Talk is silver, code is gold? Beyond traditional notions of contribution in peer production: the case of Drupal

|                             |                                                                                                                                                                                               |                  |
|-----------------------------|-----------------------------------------------------------------------------------------------------------------------------------------------------------------------------------------------|------------------|
| Project Manager/<br>Planner | Negotiate project plans with customers based on the understanding of the capabilities of Drupal. Understand best practices and communicate client needs in the language of Drupal to the team | May not need any |
| Drupal Marketer             | Possess knowledge about Drupal's capabilities and applications and communicate them to clients and other audiences in ways best suited and understood by the client or audience.              | May not need any |

Table B.1. Non exhaustive list of fundamental Drupal roles. The categories are based on a discussion within the community around the redesign of the main collaboration platform (see <https://groups.drupal.org/node/67763>, accessed on 6<sup>th</sup> May 2014.).

### Appendix C. Participation in events

|                               | Scope                           | Number of events attended | Total number of days |
|-------------------------------|---------------------------------|---------------------------|----------------------|
| London Drupal Beer and Chat   | Local                           | 7                         | 7                    |
| London Drupal Show and Tell   | Local                           | 8                         | 8                    |
| Drupal Sprint Weekend         | Local                           | 3                         | 5                    |
| London Drupal Coworking       | Local                           | 2                         | 2                    |
| Drupal Madrid                 | Local                           | 2                         | 2                    |
| London Drupal Learning        | Local                           | 1                         | 1                    |
| London Drupal 8 Release Party | Local                           | 1                         | 1                    |
| Drupal Surrey                 | Local                           | 1                         | 1                    |
| <i>DrupalCamp</i>             | National/Regional/Role-specific | 5                         | 14                   |
| <i>DrupalCon</i>              | International                   | 2                         | 12                   |
|                               |                                 | 32                        | 53                   |

Table C.1. Summary of attendance at events as part of the participant observation process in the offline field site, including the scope and the total number of events and days.

### Appendix D. Documentary analysis

|                           | Contribution | Economic sustainability | Governance and decision making | Collaboration platforms | Conflicts | Total (per type) |
|---------------------------|--------------|-------------------------|--------------------------------|-------------------------|-----------|------------------|
| Documents                 | 171          | 46                      | 120                            | 32                      | 88        | 457              |
| Profiles                  | 73           | 0                       | 0                              | 0                       | 0         | 73               |
| Videos                    | 15           | 2                       | 9                              | 2                       | 3         | 31               |
| Podcasts                  | 6            | 0                       | 3                              | 0                       | 8         | 17               |
| Other datasets            | 3            | 0                       | 5                              | 0                       | 0         | 8                |
| Total (per category)      | 268          | 48                      | 137                            | 34                      | 99        | 586              |
| Percentage (per category) | 3.11%        | 0.56%                   | 1.59%                          | 0.39%                   | 1.15%     | 6.80%            |

# Talk is silver, code is gold? Beyond traditional notions of contribution in peer production: the case of Drupal

Table D.1. Summary of characteristics of materials collected for full coding as part of the documentary analysis. The percentages reflect the number of documents per category selected for full coding, representing 6.8%. These percentages illustrate the emergence of the notion of contribution as a central category, operating as a common thread for the remaining categories. Twitter streams and collections of comments in Youtube are included as part of the category “other datasets”.

## Appendix E. Semi-structured interviews

|                 | <b>Duration (min)</b> | <b>Mode</b> | <b>Gender</b> | <b>Nationality</b> | <b>Location</b>      | <b>Account years</b> | <b>Main role</b>               |
|-----------------|-----------------------|-------------|---------------|--------------------|----------------------|----------------------|--------------------------------|
| I <sub>1</sub>  | 58                    | In-person   | M             | USA                | London (UK)          | 7                    | Site builder and developer     |
| I <sub>2</sub>  | 70                    | In-person   | M             | Mexican            | London (UK)          | 1                    | Themer and site builder        |
| I <sub>3</sub>  | 42                    | In-person   | M             | Spanish            | Madrid (Spain)       | 8                    | System architect and developer |
| I <sub>4</sub>  | 113                   | In-person   | M             | British            | London (UK)          | 11                   | Developer and project manager  |
| I <sub>5</sub>  | 195                   | In-person   | M             | Spanish            | London (UK)          | 8                    | Developer and themer           |
| I <sub>6</sub>  | 69                    | In-person   | M             | British            | London (UK)          | 9                    | Project manager                |
| I <sub>7</sub>  | 88                    | Video chat  | M             | Spanish            | Stockholm (Sweden)   | 6                    | Developer and themer           |
| I <sub>8</sub>  | 114                   | Video chat  | F             | USA                | Chicago (USA)        | 8                    | Developer                      |
| I <sub>9</sub>  | 80                    | audio chat  | M             | Austrian           | Vienna (Austria)     | 8                    | Developer                      |
| I <sub>10</sub> | 149                   | Video chat  | M             | USA                | Chicago (USA)        | 11                   | Developer and system architect |
| I <sub>11</sub> | 86                    | Video chat  | M             | British            | Newcastle (UK)       | 9                    | Project manager                |
| I <sub>12</sub> | 51                    | Video chat  | F             | British            | Brighton (UK)        | 4                    | Themer                         |
| I <sub>13</sub> | 45                    | Video chat  | M             | Finnish            | Helsinki (Finland)   | 6                    | Developer                      |
| I <sub>14</sub> | 83                    | Video chat  | M             | Canadian           | London (Canada)      | 6                    | Developer and themer           |
| I <sub>15</sub> | 117                   | Video chat  | M             | Danish             | Copenhagen (Denmark) | 11                   | Themer and project manager     |

Table E.1. Overview of the interviewees' characteristics, including common general demographic aspects, such as gender and nationality; and Drupal specific ones, such as main Drupal roles and the number of years of their Drupal.org user accounts. In addition, the duration and mode of the interview are provided.
